# Supplementary material for: 5-Aminolevulinic Acid (5-ALA)-Induced Protoporphyrin IX Fluorescence by Glioma Cells—A Fluorescence Microscopy Clinical Study
Source: MDPI journal article supplement (doi:10.3390/cancers14122844), 2022-06-08
Supplement: s1 [file s1]

## Supplementary Figure S3

A

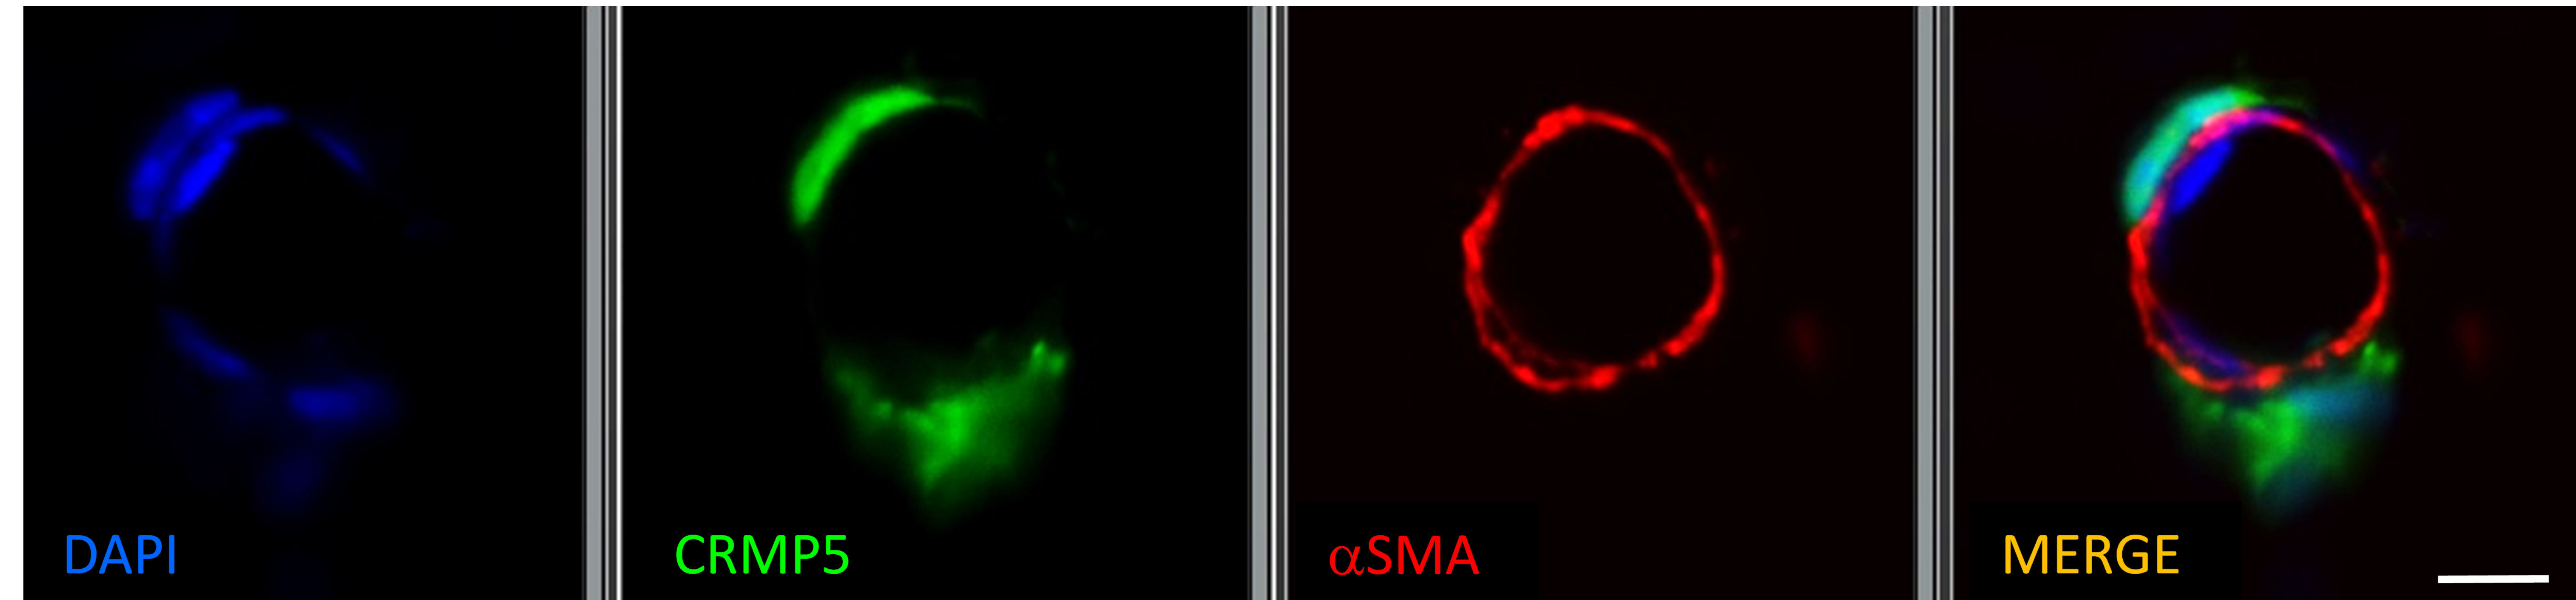

B

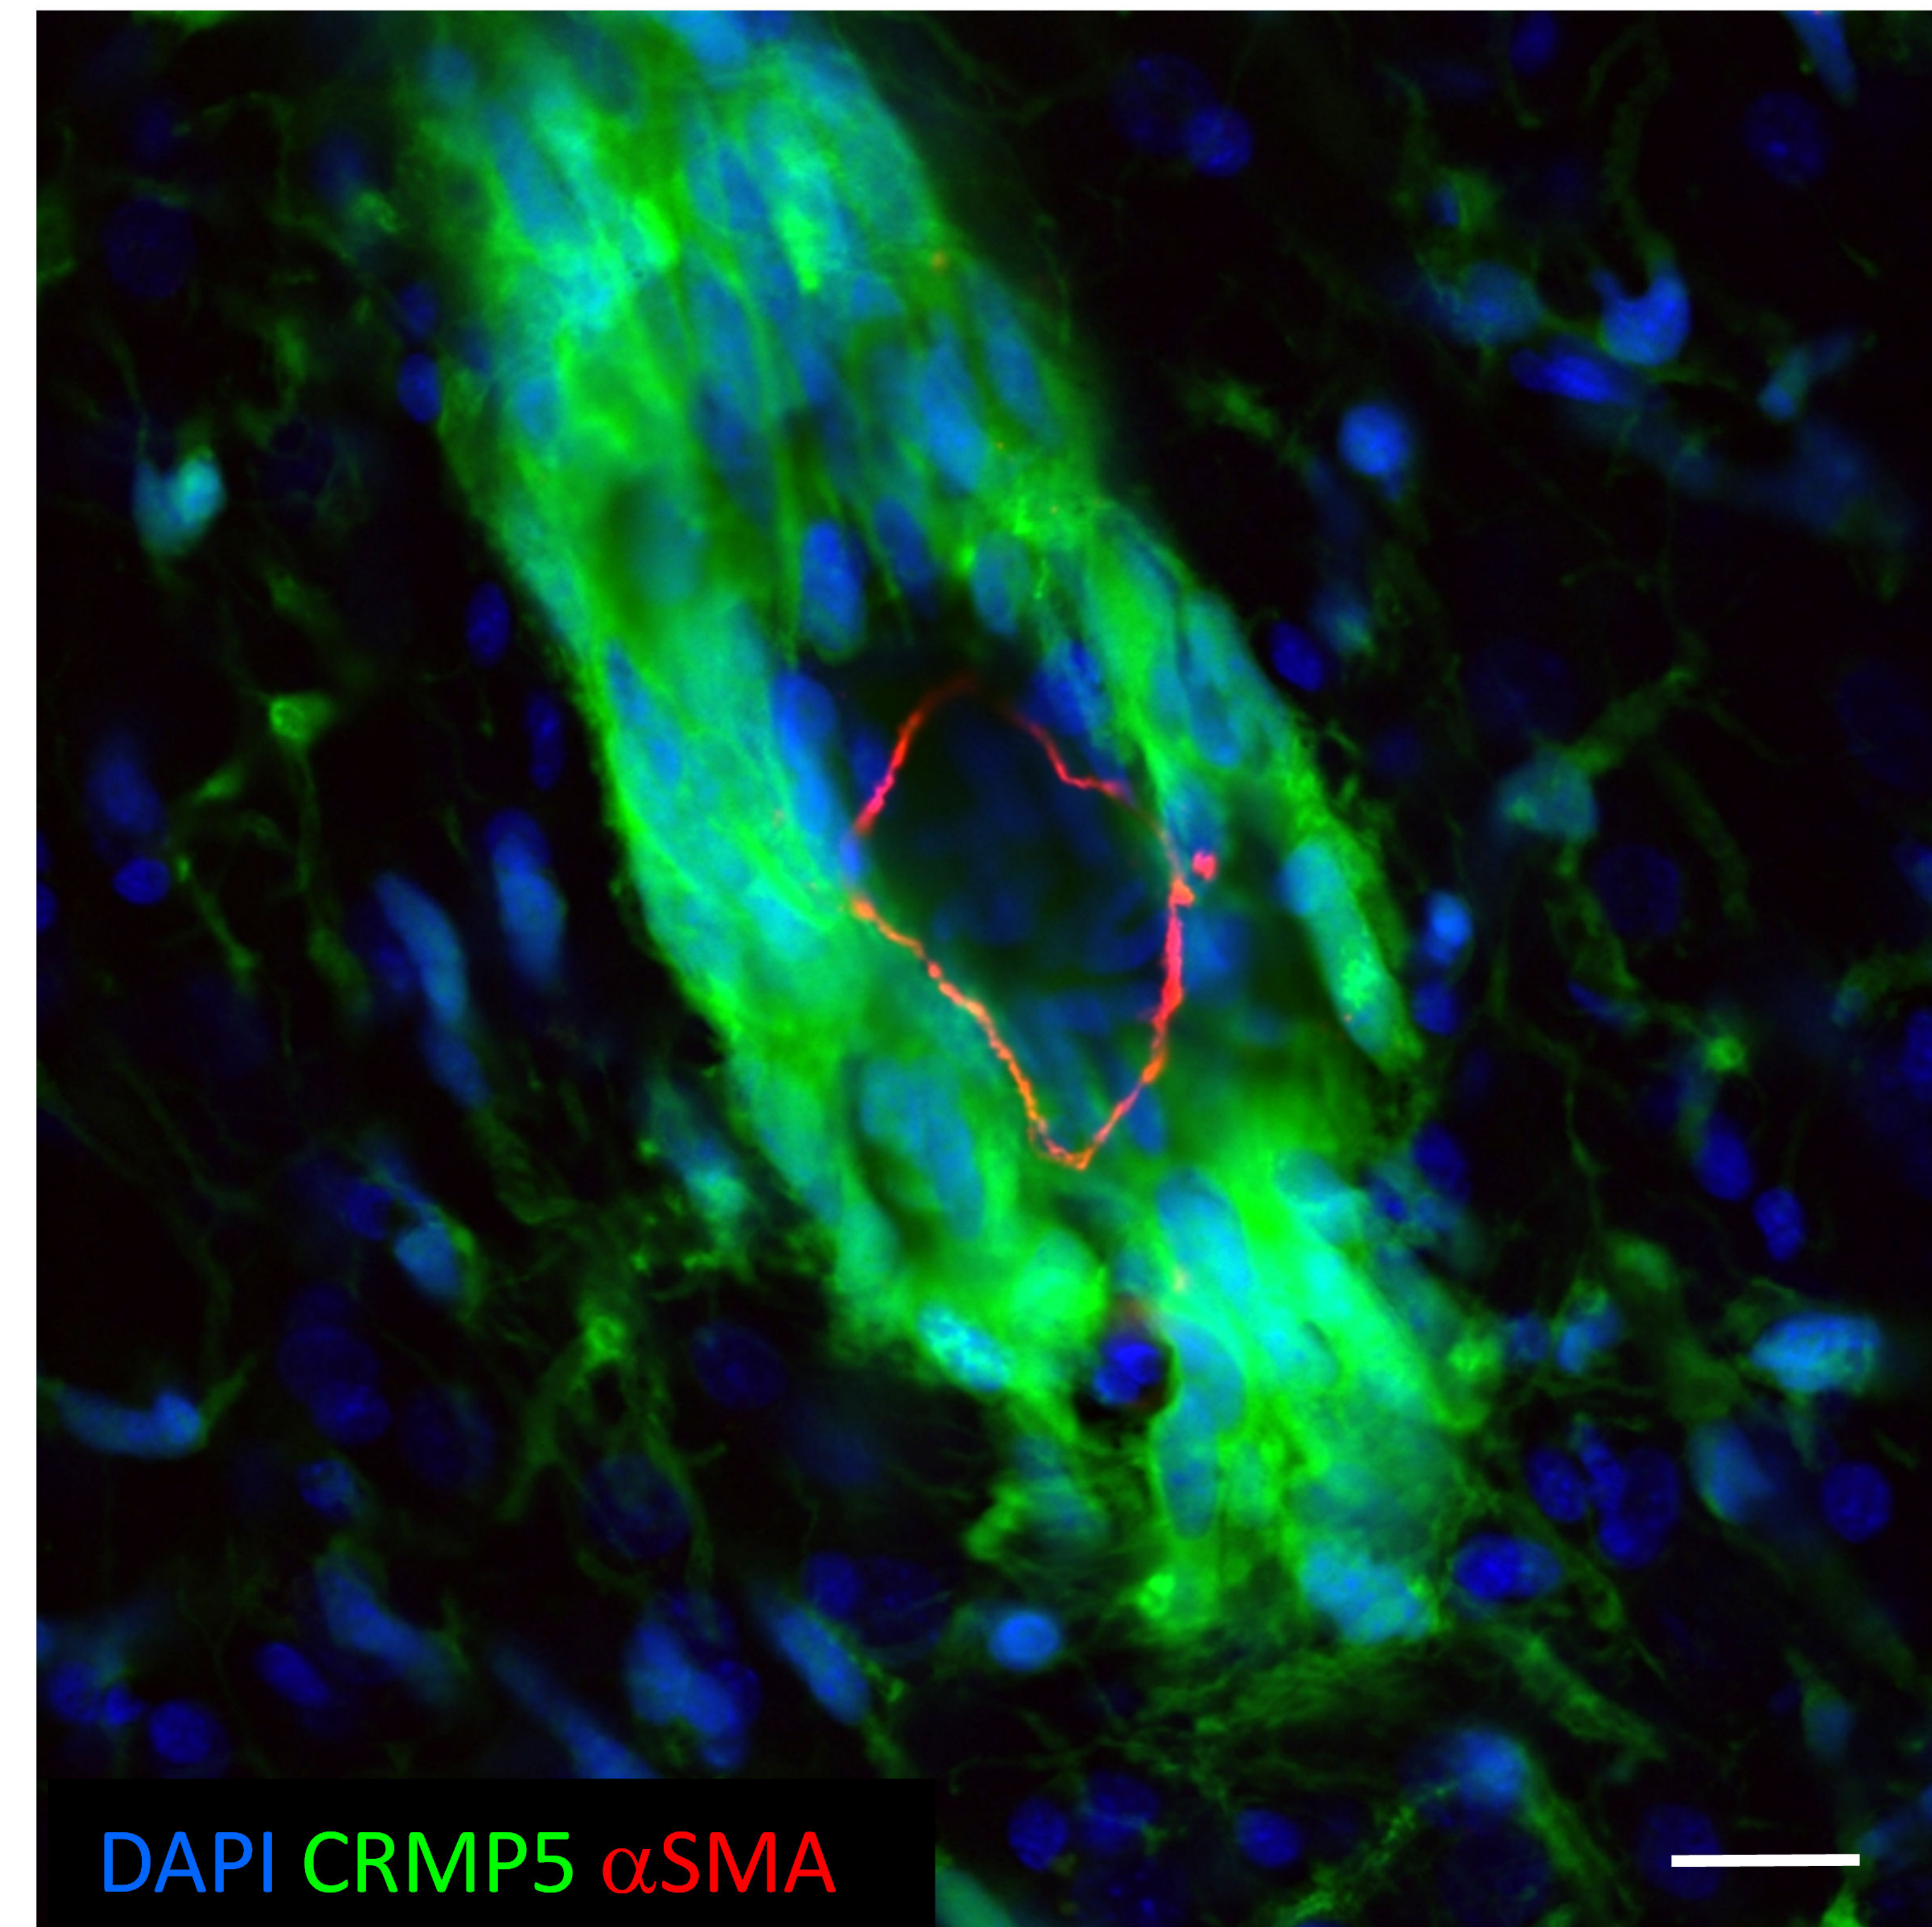

### Supplementary Figure S3.

- A. Confocal image showing perivascular infiltration by tumor cells (*green*). Activated pericytes are stained in *red*.
- B. Confocal image showing a brain vessel with thickened wall due to multilayered tumor cells (*green*) invading along the perivascular space. Activated pericytes (*red*) contribute to the vessel wall with a thin layer. Scale bars, 20  $\mu\text{m}$
