# Supplementary material for: 5-Aminolevulinic Acid (5-ALA)-Induced Protoporphyrin IX Fluorescence by Glioma Cells—A Fluorescence Microscopy Clinical Study
Source: MDPI journal article supplement (doi:10.3390/cancers14122844), 2022-06-08
Supplement: s1 [file s1]

## Supplementary Figure S2

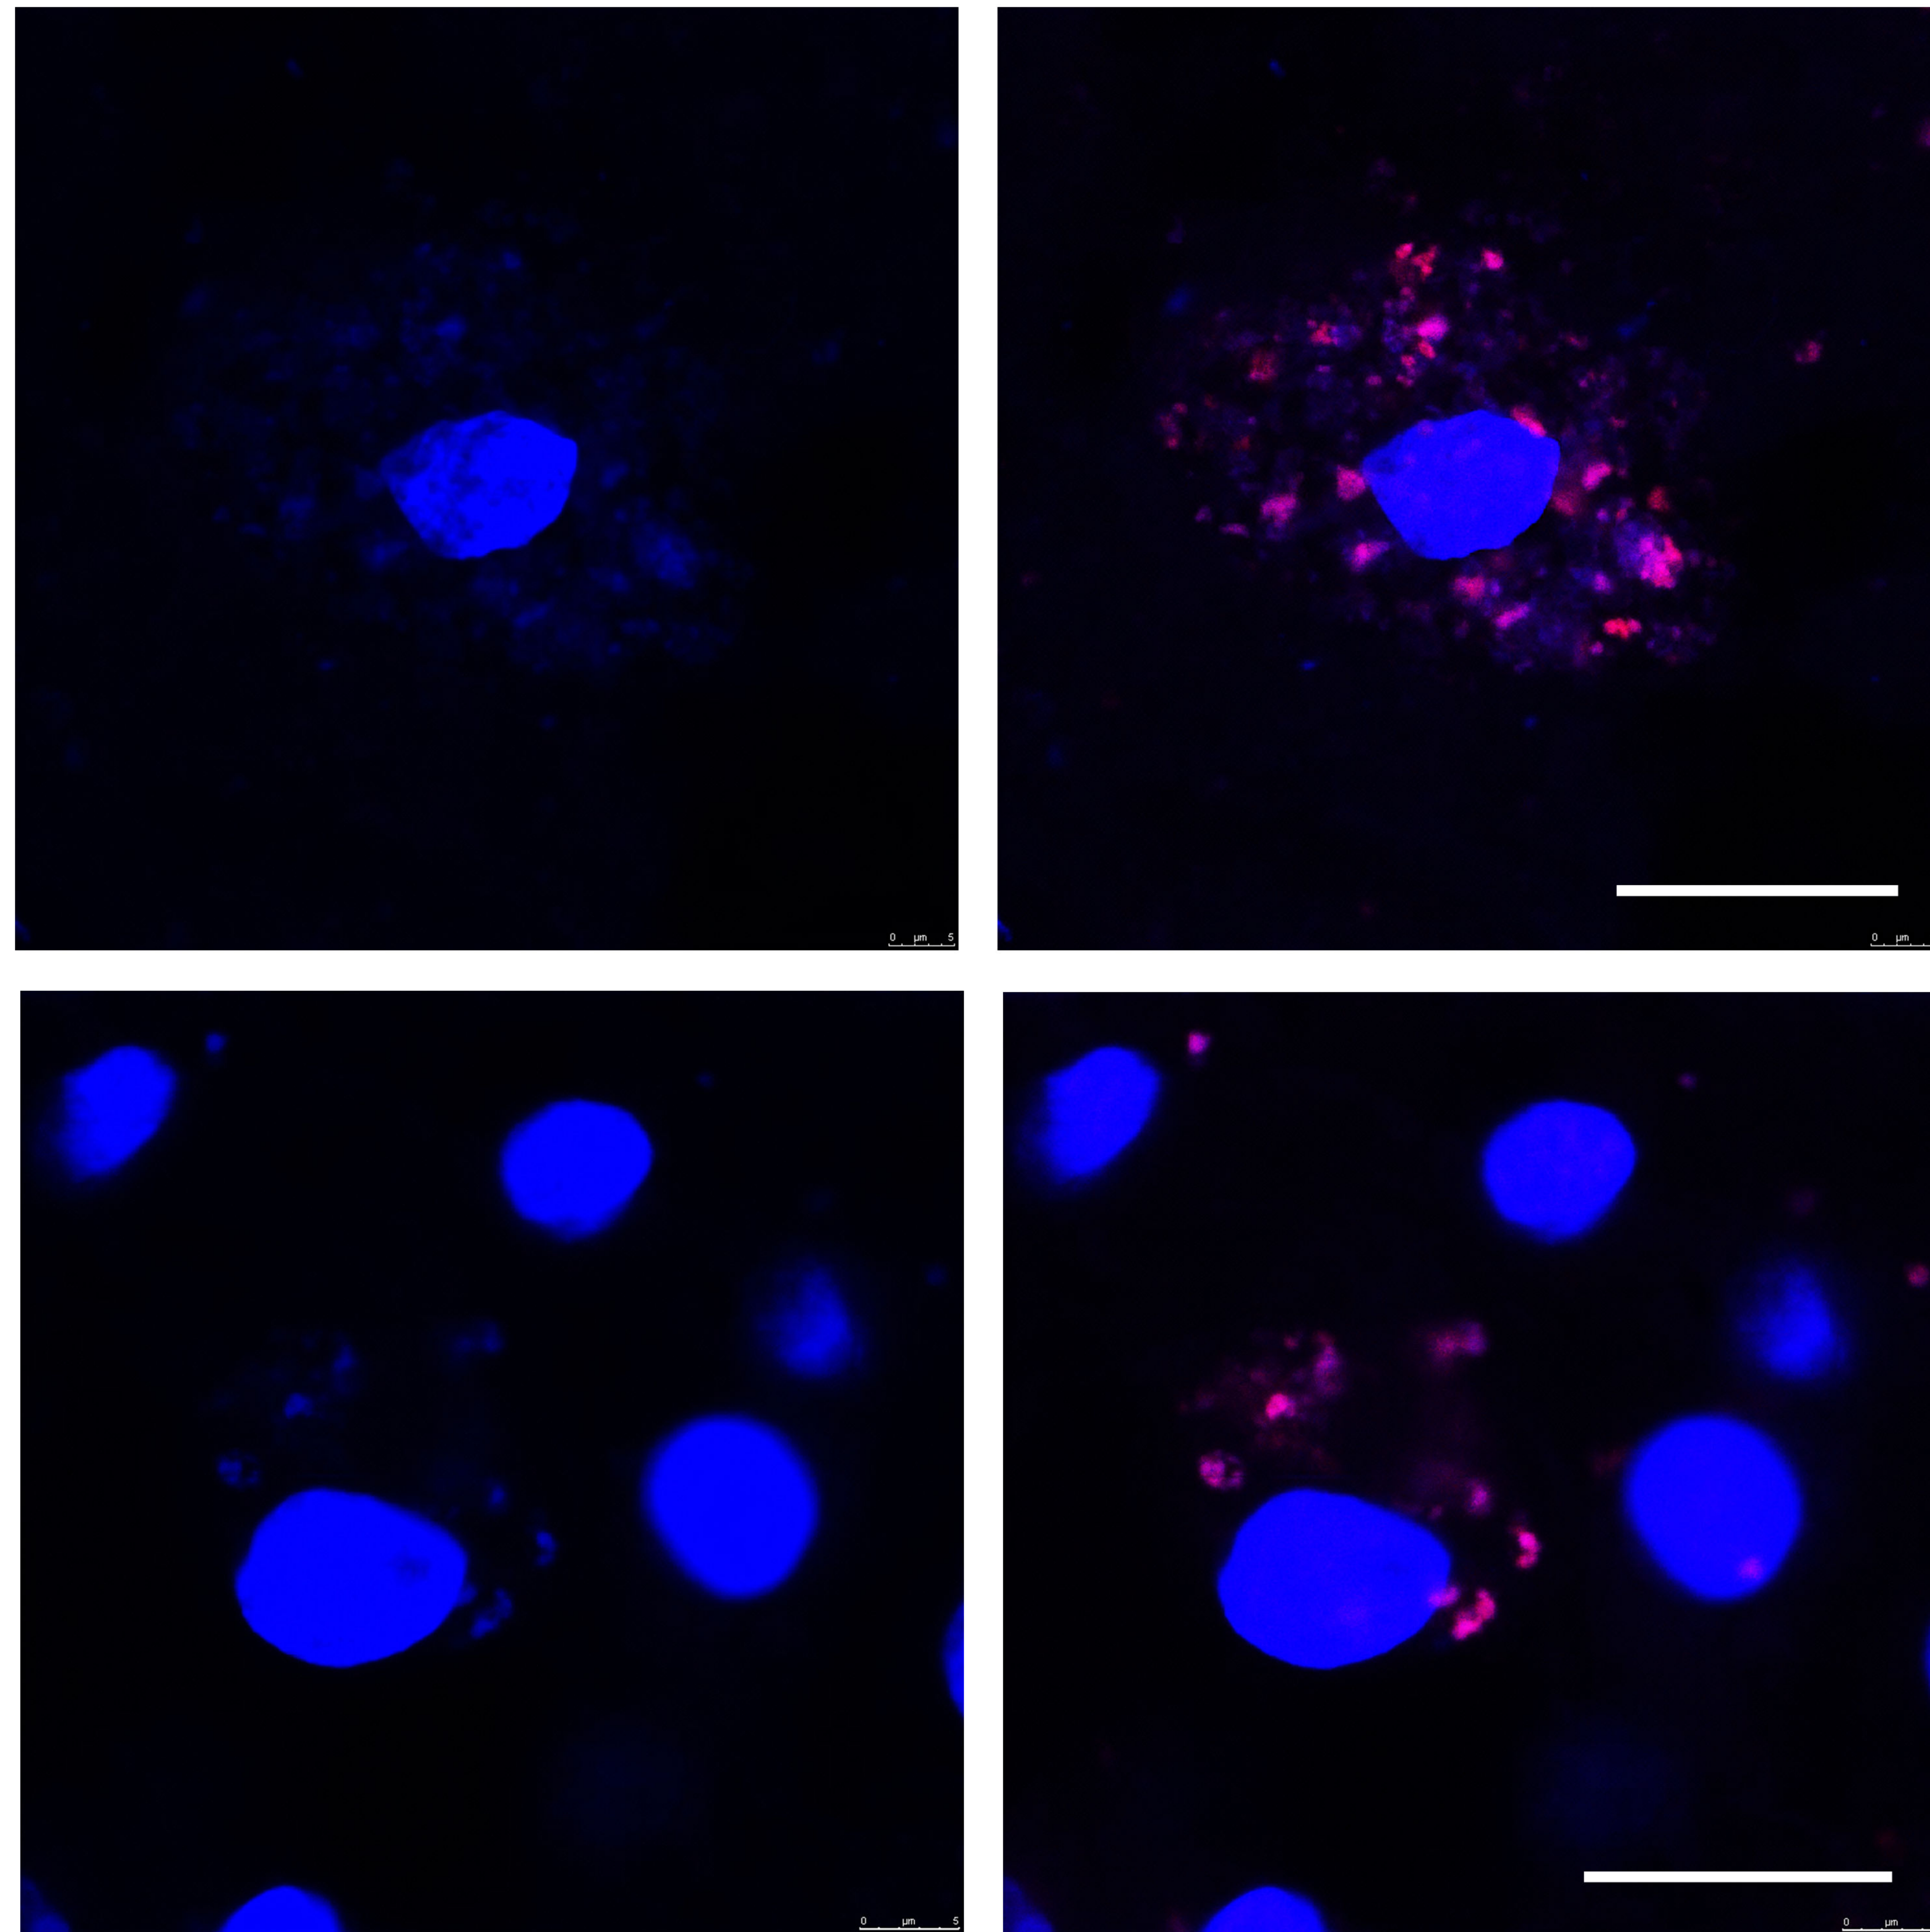

**Supplementary Figure S2 .** Two-channel acquisition exciting a GBM sample (*Case #26 in Table 1*) with a 405 nm diode laser and acquiring the emission at wavelengths ranging from 416 to 480 nm (*left panels*) and from 630 to 700 nm (*right panels*). As for the excitation wavelength of 635 nm, 5-ALA gave a dotted signal in the cell cytoplasm. Scale bars, 20  $\mu\text{m}$ .
