# Supplementary material for: 5-Aminolevulinic Acid (5-ALA)-Induced Protoporphyrin IX Fluorescence by Glioma Cells—A Fluorescence Microscopy Clinical Study
Source: MDPI journal article supplement (doi:10.3390/cancers14122844), 2022-06-08
Supplement: s1 [file s1]

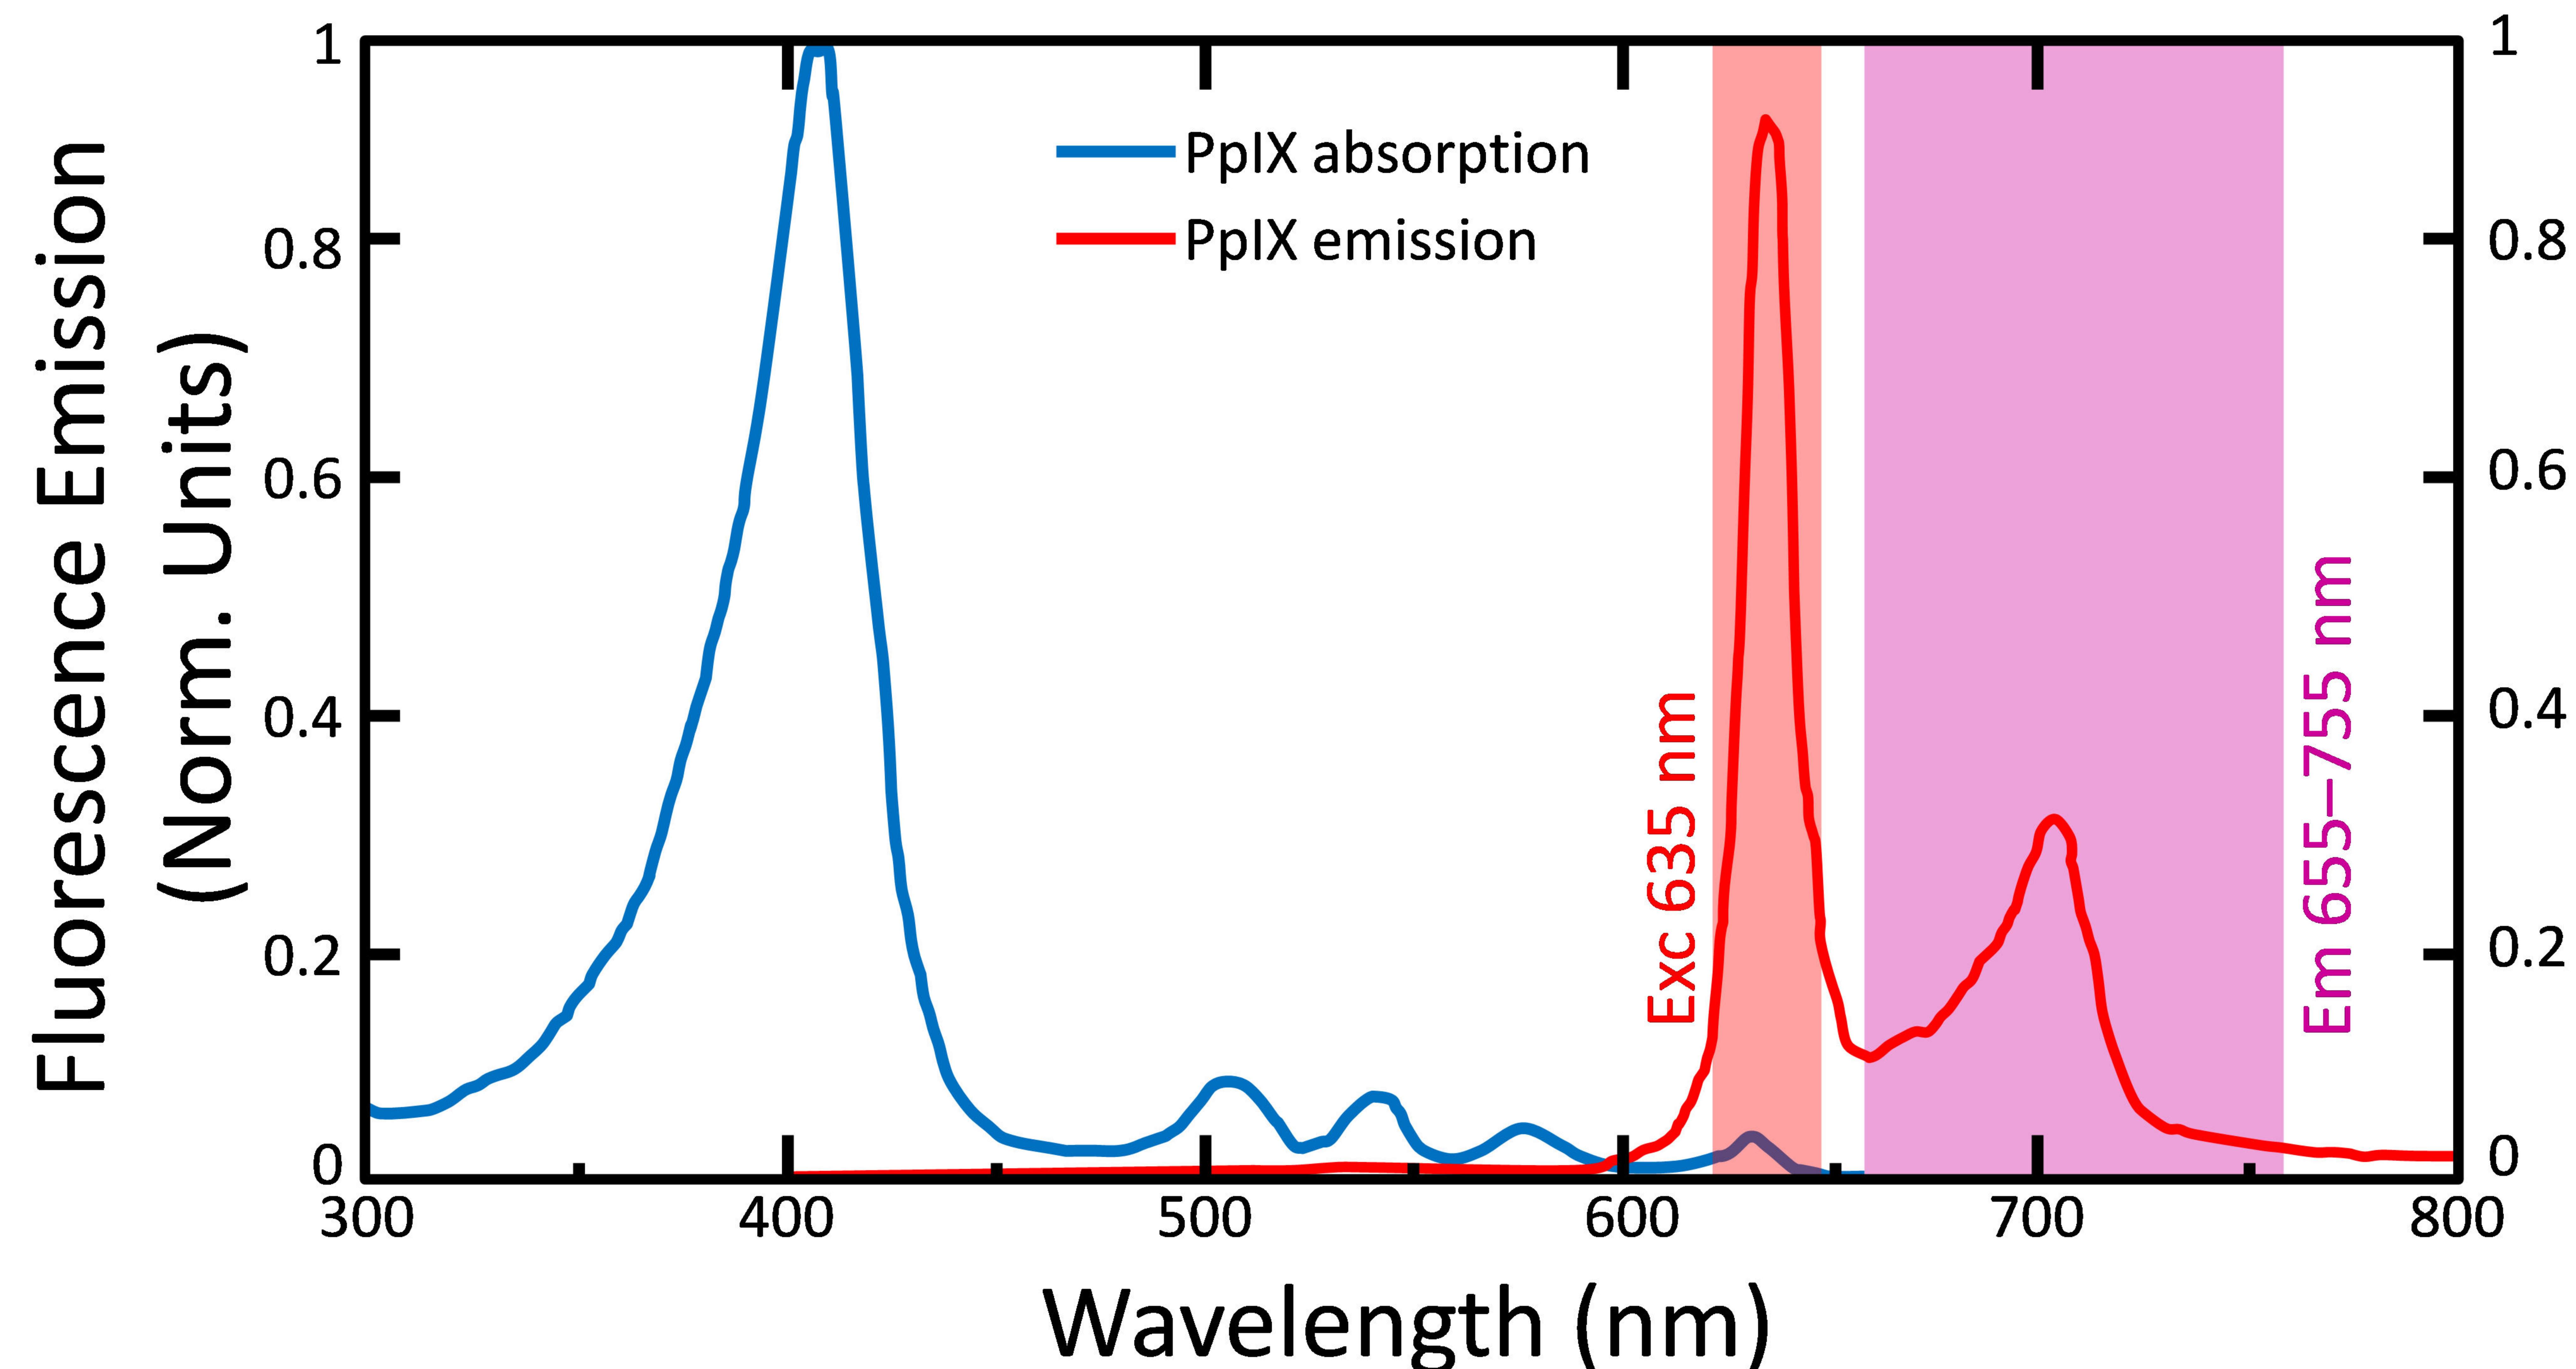

**Supplementary Figure S1.** Graph showing the PpIX absorption (excitation) and normalized emission spectra. Red and purple shaded areas correspond to the portion of PpIX excitation (Exc: 625 nm) and emission (Em: 655–755 nm) spectrum used to detect the 5-ALA signal. (Modified from Roberts, D.W.; et al., *J Neurosurg* **2018**, 128, 1690–1697 [17])
