# Supplementary material for: 5-Aminolevulinic Acid (5-ALA)-Induced Protoporphyrin IX Fluorescence by Glioma Cells—A Fluorescence Microscopy Clinical Study
Source: MDPI journal article supplement (doi:10.3390/cancers14122844), 2022-06-08
Supplement: s1 [file s1]

## Supplementary Figure S4

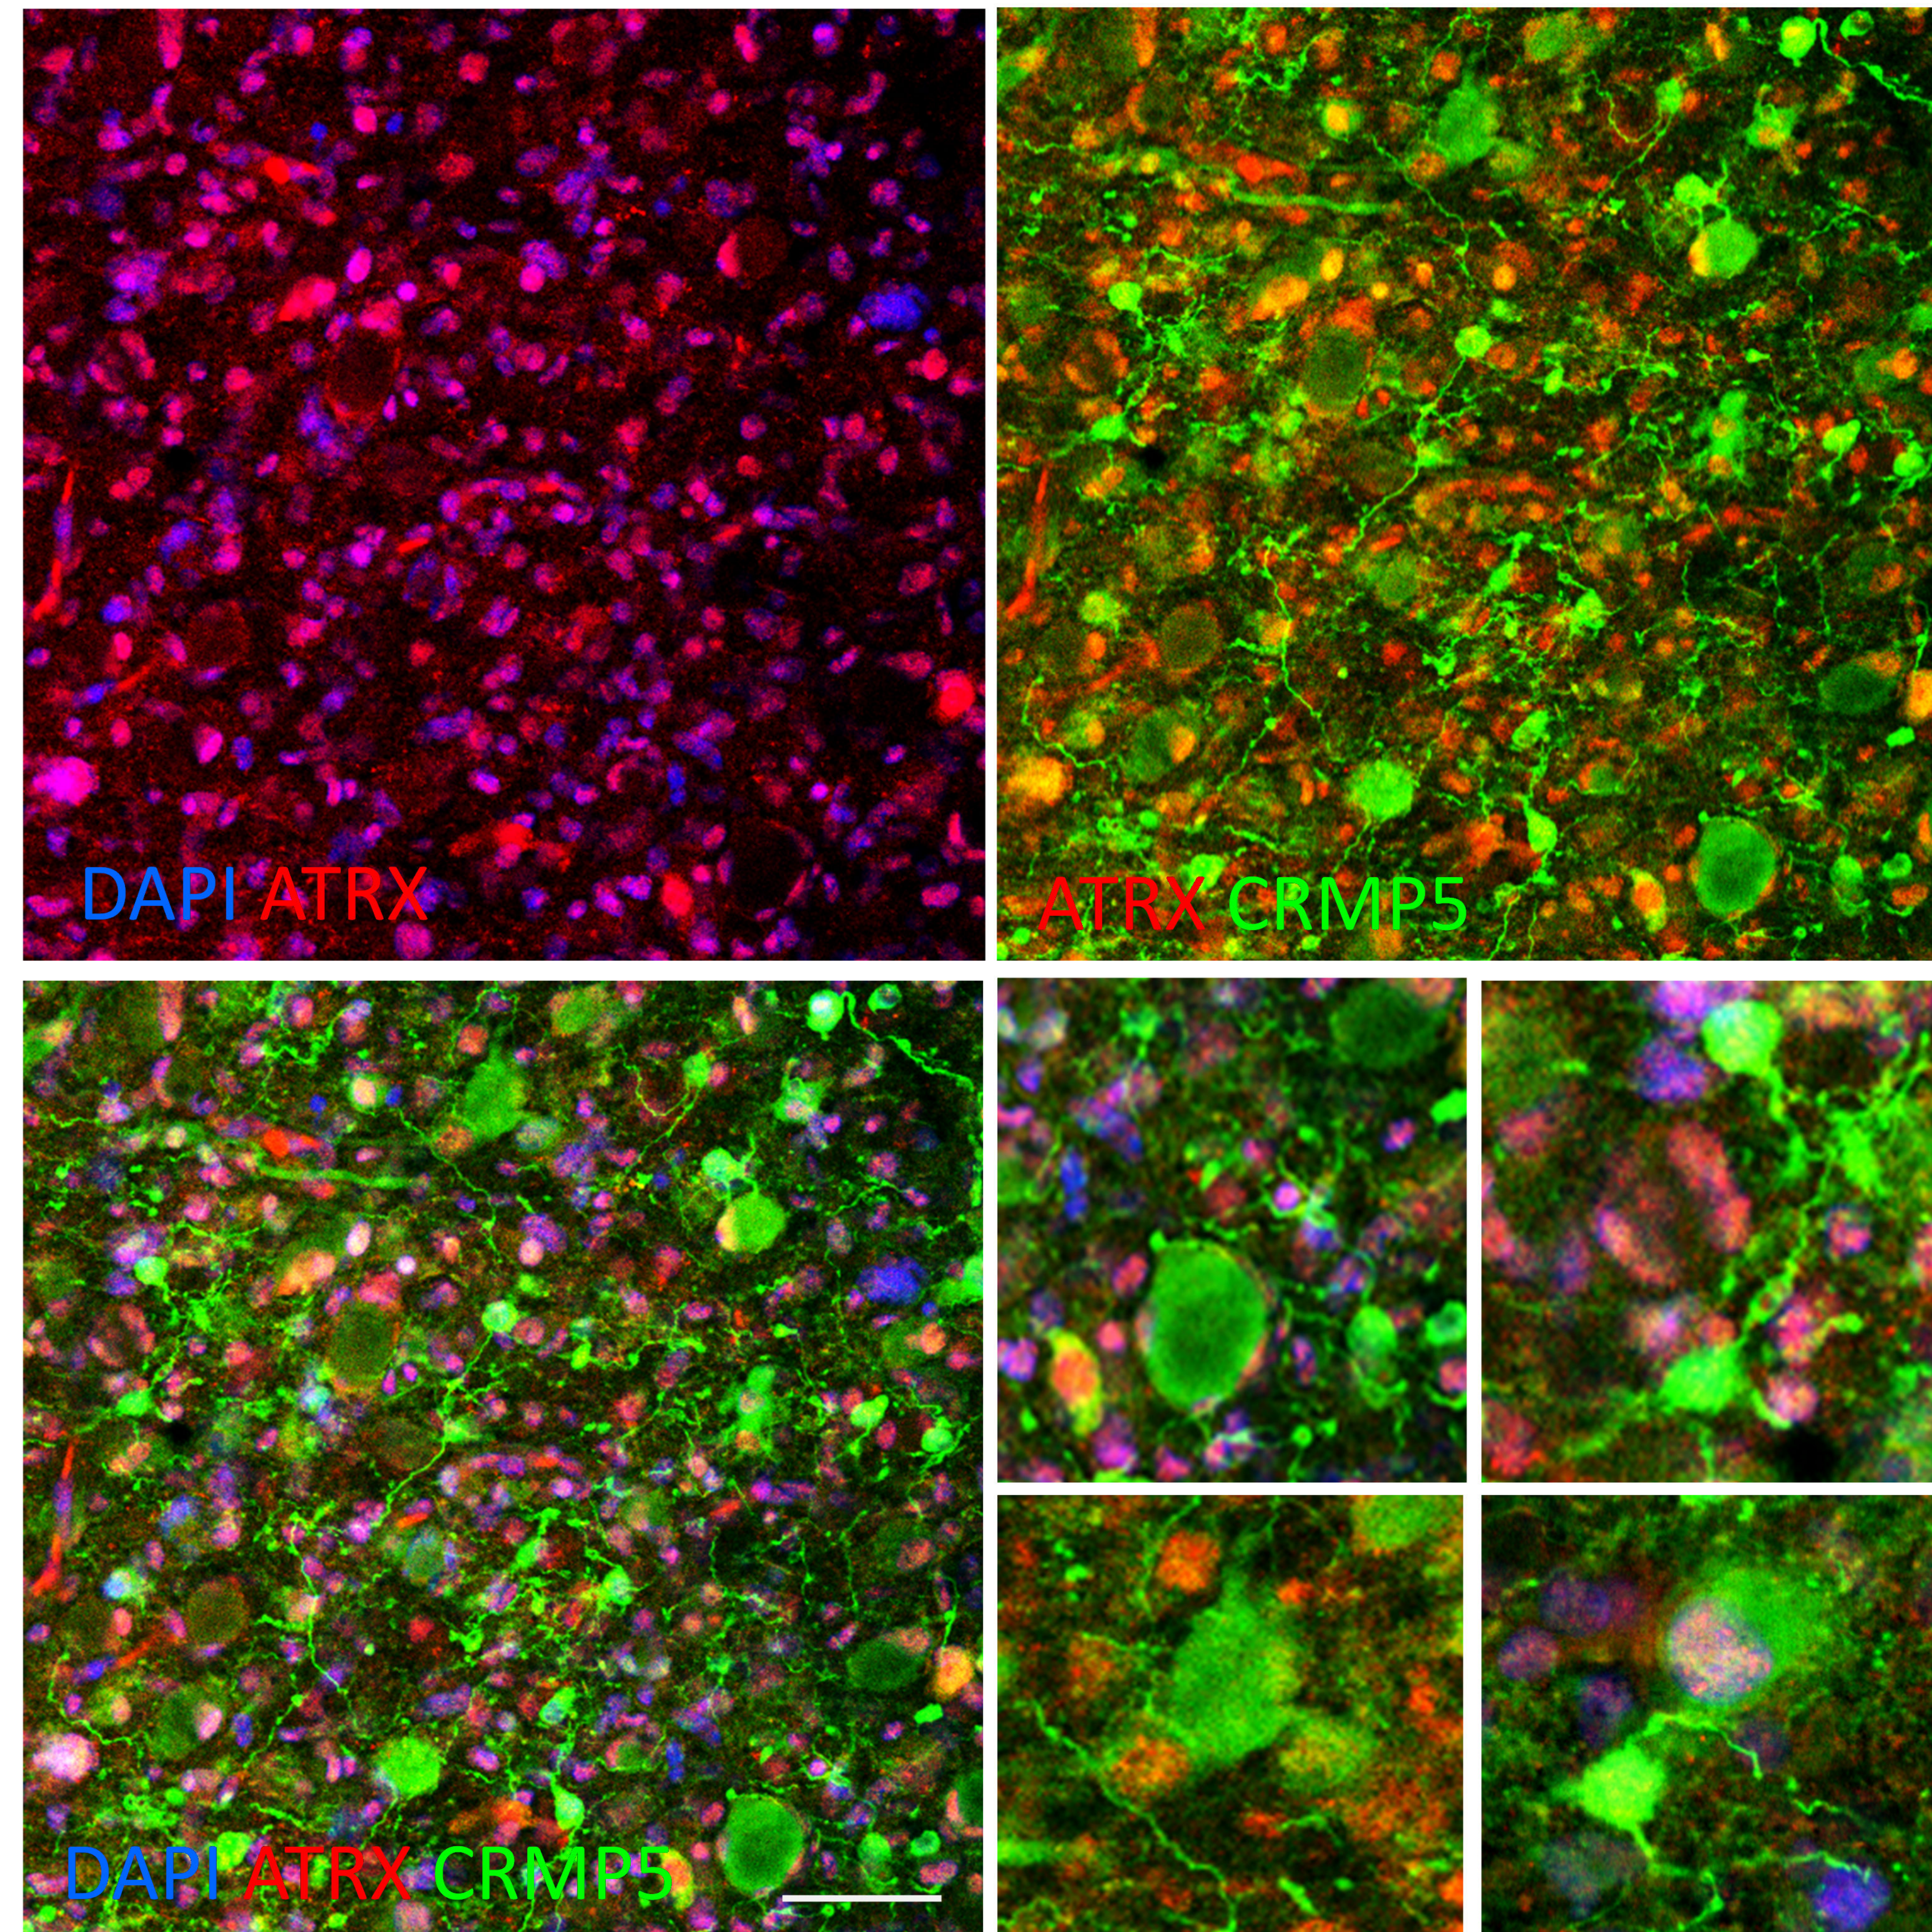

**Supplementary Figure S4.** Double immunofluorescence microscopy of a giant cell GBM with anti-ATRX and anti-CRMP5 antibodies. The cell nuclei are counterstained with DAPI. In general, there was a good relationship between CRMP5 expression and loss or hypo-expression of ATRX by the tumor cells. Several CRMP5 expressing tumor cells have lost ATRX expression in their nuclei (*insets*). Scale bar, 60  $\mu\text{m}$ .
